# Supplementary material
Source: publisher figshare collection journal article supplement (https://sage.figshare.com/ndownloader/files/20609874)
Supplement: Supplementary file 1 [file 20609874]

## Author Biography

Kyung-Bok Son is a professor by special appointment at Ewha Womans University in South Korea. He received a PhD and a master's degree from the Graduate School of Public Health, Seoul National University, South Korea. The primary goal of his research is to understand a variety of new problems related with pharmaceutical affairs, which are arising from dynamic policy environment, to evaluate policy to address these problems, and to suggest evidence-based policy options.
